# Supplementary material for: Working area effects on the energetic distribution of trap states and charge dynamics of dye-sensitized solar cells
Source: Royal Society of Chemistry journal article supplement (doi:10.1039/c8ra09330j), 2019-01-01
Supplement: c8ra09330j1.pdf [file c8ra09330j1.pdf]

## Supplementary information

### Working Area Effects on the Energetic Distribution of Trap States and Charge Dynamics of Dye-Sensitized Solar Cells

Wei Yan<sup>[a]</sup>, Ming-Ming Huo<sup>\*,[a]</sup>, Rong Hu<sup>[b]</sup>, Yong Wang<sup>[a]</sup>

*[a], Laser Research Institute, Qilu University of Technology (Shandong Academy of Sciences), Qingdao, Shandong, 266100, China;*

*[b], Research Institute for New Materials Technology, Chongqing University of Arts and Sciences, Chongqing, 402160, China.*

### ***S1. Theoretical derivation of chemical capacitance***

When the quasi-Fermi level ( $E_{Fn}$ ) of a dye-sensitized solar cell is much lower than the band edge energy of conduction band ( $E_{cb}$ ) of its  $TiO_2$  photoanode, the chemical capacitance ( $C_\mu$ ) is dominated by the trap state distribution.  $C_\mu$  can be written as<sup>[S1]</sup>:

$$C_\mu = e^2 \frac{\partial n_T}{\partial E_{Fn}} \quad (s1)$$

where  $e$  is the unit charge,  $n_T$  is the density of trapped electrons. At this time, the chemical capacitance reflects the capability of a system to accept or release additional trapped electrons with density  $n_T$  due to a change of quasi-Fermi level.

$n_T$  can be written as<sup>[S2]</sup>

$$n_T = \int_{E_{vb}}^{E_{cb}} g_T(E) f(E, E_{Fn}) dE = N_T \exp\left[\frac{E_{Fn} - E_{cb}}{k_B T_T}\right] \quad (s2)$$

Where  $E_{vb}$  is the band edge energy of the valence band,  $g_T(E)$  is the density of trap states as a function of energy  $E$ ,  $f(E, E_{Fn})$  is the Fermi-Dirac function,  $N_T$  and  $T_T$  are the total density and the characteristic temperature of the trap states.

For trapped electrons in Boltzmann distribution,  $C_\mu$  can be expressed as<sup>[S3]</sup>

$$C_\mu = e^2 \frac{N_T}{k_B T_T} \exp\left[\frac{E_{Fn} - E_{cb}}{k_B T_T}\right] \quad (s3)$$

Because of  $V_{ph} = (E_{Fn} - E_{redox})/e$ ,  $E_{redox}$  is the redox energy of electrolyte. Eq. (s3) can be expressed as

$$C_\mu = e^2 \left[ B \exp\left(\frac{e}{k_B T_T} V_{ph}\right) \right] \quad (s4)$$

So  $C_\mu$  is exponentially dependent on  $V_{ph}$ . The pre-exponential factors  $B$  is

$$B = \frac{N_T}{k_B T_T} \exp\left(\frac{E_{redox} - E_{cb}}{k_B T_T}\right) \quad (s5)$$

## References

[S1] Y. Wang, D. Wu, L.-M. Fu, X.-C. Ai, D. Xu and J.-P. Zhang, *Chem. Phys. Chem.* 2015, **16**, 2253.

[S2] J. Bisquert, V. S. Vikhrenko, *J. Phys. Chem. B* 2004, **108**, 2313.

[S3] J. Bisquert, A. Zaban, M. Greenshtein and I. M. Seró, *J. Am. Chem. Soc.* 2004, **126**, 13550.
